# Supplementary material for: High deforestation trajectories in Cambodia slowly transformed through economic land concession restrictions and strategic execution of REDD+ protected areas
Source: PubMed Central journal article supplement (PMC9568659; doi:10.1038/s41598-022-19660-0), 2022-10-14
Supplement: 41598_2022_19660_MOESM1_ESM.pdf [file 41598_2022_19660_MOESM1_ESM.pdf]

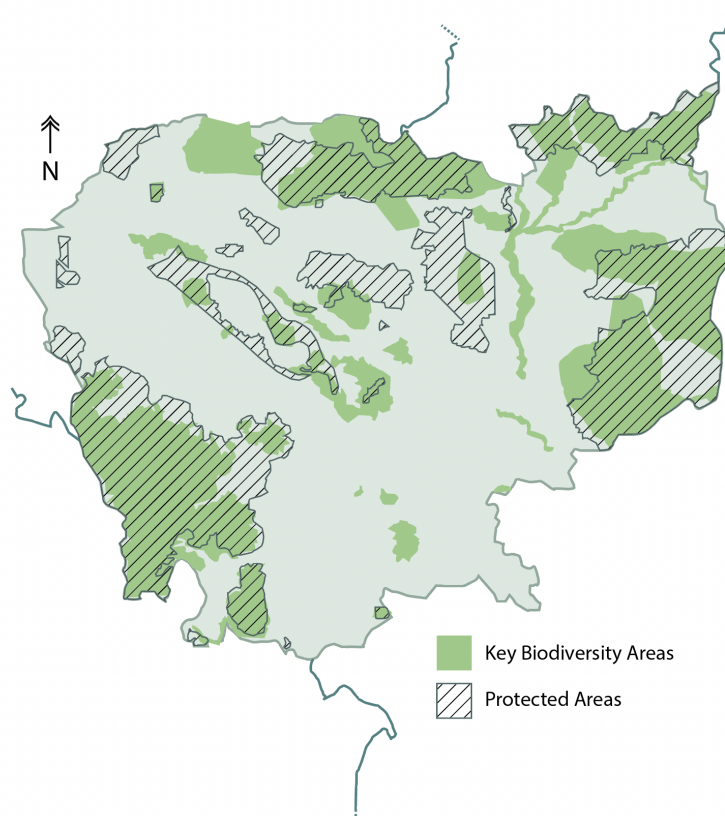

**Supplementary Figure 1.** Protected Areas<sup>6</sup> and Key Biodiversity Areas<sup>41</sup> in Cambodia.

| REDD+ Project                | REDD+ start year | Protected Status year | Protected Status                                                                                      | High threat borders | NGO Presence                                     | Zone deforestation (since 2001) |
|------------------------------|------------------|-----------------------|-------------------------------------------------------------------------------------------------------|---------------------|--------------------------------------------------|---------------------------------|
| Keo Seima Wildlife Sanctuary | 2010             | 2002, 2016            | Category IV (Wildlife Sanctuary): core zone of high conservation value, access prohibited             | 64%                 | Wildlife Conservation Society present since 2002 | 15.4%                           |
| Tumring                      | 2015             | 2008-2010             | Category VI (Community Forest): sustainable use of natural resources                                  | 85%                 | No NGO presence                                  | 37.9%                           |
| Southern Cardamom            | 2015             | 2016                  | Category II (National Park): high conservation value with access permitted for recreation and tourism | 47%                 | Wildlife Alliance present since 2002             | 11.5%                           |

**Supplementary Table 1.** A summary of the REDD+ projects registered in Cambodia. IUCN Management Category Protected status refers to the year the region received official protection category status from the Royal Government of Cambodia. High threat borders estimated based on the percentage of REDD+ project borders adjacent to unprotected land. Zone deforestation is defined as the total cumulative forest loss as a percentage of the area within the protected area blocks (Figure 2) with a 10km buffer.

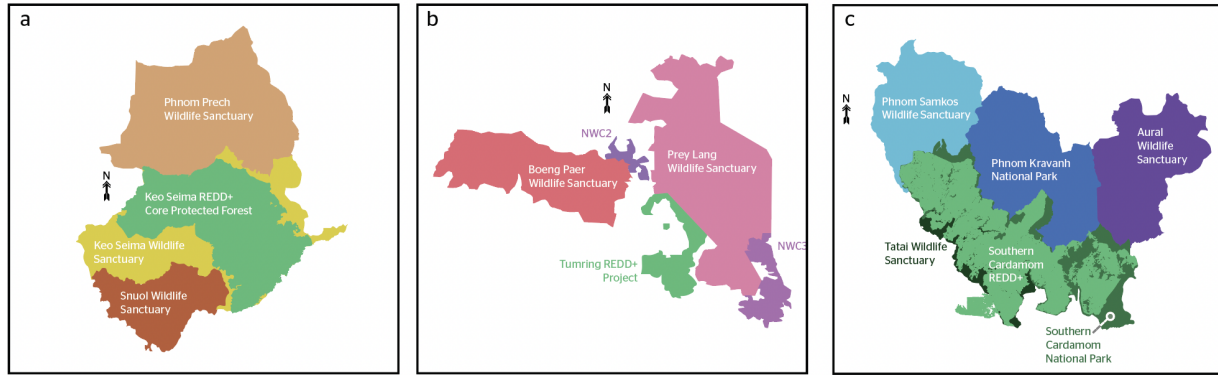

**Supplementary Figure 2.** The three protection area blocks analyzed: (a) Eastern Block, (b) Central Block and (c) Southwestern Block. Protected area layers accessed on Global Forest Watch<sup>7</sup>, mapped on ArcGIS v10.9, finalized on Adobe Illustrator v26.2.1<sup>41</sup>.

| <b>Deforestation</b>       | <b>Block 1:<br/>Eastern</b> | <b>Block 2:<br/>Central</b> | <b>Block 3:<br/>Southwestern</b> | <b>Cambodia<br/>(country-level)</b> |
|----------------------------|-----------------------------|-----------------------------|----------------------------------|-------------------------------------|
| 2001-2010 (annual average) | 0.45%                       | 0.80%                       | 0.39%                            | 1.01%                               |
| 2011-2021 (annual average) | 0.99%                       | 2.72%                       | 0.69%                            | 1.76%                               |
| 2001-2021 (total)          | 15.4%                       | 37.9%                       | 11.5%                            | 29.5%                               |

**Supplementary Table 2.** A summary of the average annual deforestation rates and total deforestation occurring within the studied 3 protected area blocks compared to the country-level.

| Enforcement Indicator   | Pre-REDD+ (2002-2015) |                | Post-REDD+ (2016-2022) |                | REDD+ improvement |
|-------------------------|-----------------------|----------------|------------------------|----------------|-------------------|
|                         | Total                 | Average annual | Total                  | Average annual |                   |
| # of patrols            | 22,543                | 1,734          | 32,220                 | 3,580          | +106%             |
| # of signs installed    | 10,716                | 824            | 7,696                  | 855            | +4%               |
| # logs seized           | 37,723                | 2,902          | 30,438                 | 3,382          | +17%              |
| # chainsaws confiscated | 1,011                 | 78             | 6,940                  | 771            | +892%             |
| # snares removed        | 113,898               | 8,761          | 231,066                | 25,674         | +193%             |
| # live animals rescued  | 4,234                 | 423            | 3,798                  | 422            | 0.1%              |

**Supplementary Table 3.** A summary of enforcement data for the Southern Cardamom REDD+ project, provided by Wildlife Alliance (2022). The pre-REDD+ period refers to the time when Wildlife Alliance was present on the ground conducting protection activities prior to the initiation of the REDD+ project. The post-REDD+ period refers to the point of the Southern Cardamom REDD+ project onward, during which Wildlife Alliance (in collaboration with the Royal Government of Cambodia) stepped up enforcement activities through the utilization of carbon finance from the REDD+ VCS sales.

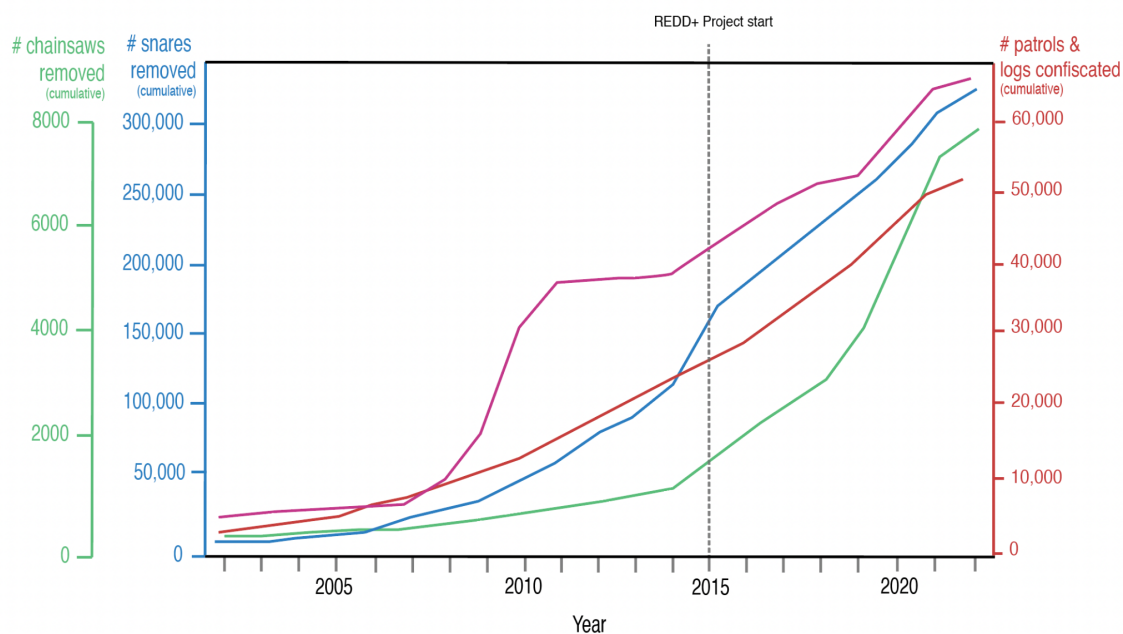

**Supplementary Figure 3.** Boots-on-the-ground enforcement results from the Southern Cardamom area, data provided by Wildlife Alliance (2022). Pre-2015 results demonstrate activities prior to REDD+ initiation. Data summarized in Supplementary Table 3.

|                             | # of tourists | Income generated (USD) |
|-----------------------------|---------------|------------------------|
| Pre-REDD+ total (from 2008) | 18,505        | \$608,116              |
| Pre-REDD+ annual average    | 2056          | \$67,568               |
| REDD+ total (from 2017)     | 19,307        | \$766,932              |
| REDD+ annual average        | 3861          | \$153,386              |

**Supplementary Table 4.** Eco-tourism data from the Southern Cardamom REDD+ project, data provided by Wildlife Alliance (2022).

| Project                         | tCO <sub>2</sub> e/year achieved | Project area | tCO <sub>2</sub> e/year/ha |
|---------------------------------|----------------------------------|--------------|----------------------------|
| Southern Cardamom REDD+ Project | 5,521,098                        | 27,605,489   | 11.9                       |
| Keo Seima REDD+ Project         | 1,819,837                        | 16,378,530   | 6.2                        |
| Tumring REDD+ Project           | 161,353                          | 645,410      | 2.4                        |

**Supplementary Table 5.** A summary of the VCU (verified carbon units) in tCO<sub>2</sub>e, averaged annually based on the verified VCUs achieved by the project to date. The data tCO<sub>2</sub>e/year and project area were obtained from project verification reports and project description documents, respectively, publicly on the Verra Carbon Standard Registry accessible at: <https://registry.verra.org/app/search/VCS>.

| Protected Area                            | Protected Status Details                                                           |
|-------------------------------------------|------------------------------------------------------------------------------------|
| Chhep Wildlife Sanctuary (CWS)            | Designated in 2002 as a Protected Forest, upgraded to a Wildlife Sanctuary in 2016 |
| Preah Roka Wildlife Sanctuary (PPRWS)     | Designated as a Wildlife Sanctuary in 2016                                         |
| Kulen Promtep Wildlife Sanctuary (KPWS)   | Designated as a Wildlife Sanctuary in 1993                                         |
| Phnom Tbeng Natural Heritage Park (PTNHP) | Designated as a Heritage Park in 2016                                              |

**Supplementary Table 6.** A summary of Protected Areas making up the upcoming Northern Plains Landscape REDD+ project, developed by the Wildlife Conservation Society (WCS) in collaboration with the Royal Government of Cambodia.

| Characteristic                                                             | KSRP | SCRP | TRP | NPL | PSWS |
|----------------------------------------------------------------------------|------|------|-----|-----|------|
| Low - moderate deforestation rates (at or below the country-level average) | ✓    | ✓    | ✗   | ✓   | ✓    |
| Historic NGO presence                                                      | ✓    | ✓    | ✗   | ✓   | ✓    |
| Protection activities backed by law enforcement                            | ✓    | ✓    | ✗   | ?   | ?    |
| Stable carbon credit funding                                               | ✓    | ✓    | ✗   | ?   | ?    |
| REDD+ status backed by high-level national protection category             | ✓    | ✓    | ✗   | ✓   | ✓    |

**Supplementary Table 7.** Characteristics of REDD+ projects in Cambodia, categorized for current (KSRP: Keo Seima REDD+ Project, SCRП: Southern Cardamom REDD+ Project, TRP: Tumring REDD+ Project) and future (NPL: Northern Plains Landscape REDD+ Project, PSWS: Phnom Samkos Wildlife Sanctuary REDD+ Project) according to the presence (✓), absence (✗) and not confirmed (?) status.
